# Supplementary material
Source: PubMed Central journal article supplement (PMC9269579)

## **Supplemental Material Table of Contents**

**Supplemental Table 1.** ICD-9-CM and ICD-10-CM codes used to identify venous thromboembolism

**Supplemental Table 2.** Diagnosis related group codes used identify recent hospitalization for surgery or trauma

**Supplemental Methods:** Approaches used to determine the disability proxy score

**Supplemental Table 3.** HCPCS and ICD-9-CM diagnosis codes used to define the disability proxy score

**Supplemental Table 4.** Baseline characteristics of the study sample prior to inverse probability of treatment weighting

**Supplemental Table 5.** Pattern of drug discontinuation or switching over time

**Supplemental Table 6.** Reasons for the end of follow-up for the ITT analysis

**Supplemental Figure 1.** Comparisons, adjusted using IPT and IPC weighting for sociodemographic factors, comorbid conditions, disability proxy score, concomitant medications, and healthcare utilization, for apixaban vs. warfarin in the 3-month follow-up analysis.

CAS, censored-at-drug-switching; CI, confidence interval; HR, hazard ratio; IPC, inverse-probability-of-censoring; IPT, inverse-probability-of-treatment; ITT, intention-to-treat; PY, person-years; VTE, venous thromboembolism

**Supplemental Table 1.** ICD-9-CM and ICD-10-CM codes used to identify venous thromboembolism

| <b>Venous Thromboembolism Diagnosis Codes</b> |         |         |         |
|-----------------------------------------------|---------|---------|---------|
| <b>ICD-9-CM Thromboembolic Event</b>          |         |         |         |
| 415.1*                                        | 453.4*  | 453.84  | 453.87  |
| 451.1*                                        | 453.82  | 453.85  | 453.89  |
| 453.2                                         | 453.83  | 453.86  | 453.9   |
| <b>ICD-10-CM Thromboembolic Event</b>         |         |         |         |
| I26.0*                                        | I80.23* | I82.44* | I82.890 |
| I26.9*                                        | I80.29* | I82.49* | I82.A1* |
| I80.1*                                        | I82.40* | I82.4Y* | I82.B1* |
| I80.20*                                       | I82.41* | I82.4Z* | I82.C1* |
| I82.210                                       | I82.42* | I82.60* |         |
| I80.22*                                       | I82.43* | I82.62* |         |

ICD-9-CM, International Classifications of Diseases, Ninth Revision, Clinical Modification;

ICD-10-CM, International Classifications of Diseases, Tenth Revision, Clinical Modification;

VTE, venous thromboembolism

\*indicates any digit in this position

**Supplemental Table 2.** Diagnosis-related group codes used identify recent hospitalization for surgery or trauma

| <b>DRG Codes</b> |     |     |     |     |     |     |     |     |     |     |     |     |     |     |     |     |     |     |     |
|------------------|-----|-----|-----|-----|-----|-----|-----|-----|-----|-----|-----|-----|-----|-----|-----|-----|-----|-----|-----|
| 001              | 026 | 116 | 184 | 234 | 256 | 326 | 346 | 412 | 459 | 479 | 502 | 571 | 617 | 658 | 709 | 744 | 800 | 854 | 929 |
| 002              | 027 | 117 | 185 | 235 | 257 | 327 | 347 | 413 | 460 | 480 | 503 | 572 | 618 | 659 | 710 | 745 | 801 | 855 | 939 |
| 003              | 028 | 129 | 215 | 236 | 258 | 328 | 348 | 414 | 461 | 481 | 504 | 573 | 619 | 660 | 711 | 746 | 802 | 856 | 940 |
| 004              | 029 | 130 | 216 | 239 | 259 | 329 | 349 | 415 | 462 | 482 | 505 | 574 | 620 | 661 | 712 | 747 | 803 | 857 | 941 |
| 005              | 030 | 131 | 217 | 240 | 260 | 330 | 350 | 416 | 463 | 483 | 506 | 575 | 621 | 662 | 713 | 748 | 804 | 858 | 955 |
| 006              | 031 | 132 | 218 | 241 | 261 | 331 | 351 | 417 | 464 | 485 | 507 | 576 | 622 | 663 | 714 | 749 | 817 | 870 | 956 |
| 007              | 032 | 133 | 219 | 242 | 262 | 332 | 352 | 418 | 465 | 486 | 508 | 577 | 623 | 664 | 715 | 750 | 818 | 876 | 957 |
| 008              | 033 | 134 | 220 | 243 | 263 | 333 | 353 | 419 | 466 | 487 | 509 | 578 | 624 | 665 | 716 | 768 | 819 | 901 | 958 |
| 010              | 034 | 135 | 221 | 244 | 264 | 334 | 354 | 420 | 467 | 488 | 510 | 579 | 625 | 666 | 717 | 769 | 820 | 902 | 959 |
| 011              | 035 | 136 | 222 | 245 | 265 | 335 | 355 | 421 | 468 | 489 | 511 | 580 | 626 | 667 | 718 | 770 | 821 | 903 | 963 |
| 012              | 036 | 137 | 223 | 246 | 266 | 336 | 356 | 422 | 469 | 492 | 512 | 581 | 627 | 668 | 734 | 783 | 822 | 904 | 964 |
| 013              | 037 | 138 | 224 | 247 | 267 | 337 | 357 | 423 | 470 | 493 | 513 | 582 | 628 | 669 | 735 | 784 | 823 | 905 | 965 |
| 014              | 038 | 139 | 225 | 248 | 268 | 338 | 358 | 424 | 471 | 494 | 514 | 583 | 629 | 670 | 736 | 785 | 824 | 906 | 969 |
| 016              | 039 | 163 | 226 | 249 | 269 | 339 | 405 | 425 | 472 | 495 | 515 | 584 | 630 | 671 | 737 | 786 | 825 | 907 | 970 |
| 017              | 040 | 164 | 227 | 250 | 270 | 340 | 406 | 453 | 473 | 496 | 516 | 585 | 652 | 672 | 738 | 787 | 826 | 908 | 981 |
| 020              | 041 | 165 | 228 | 251 | 271 | 341 | 407 | 454 | 474 | 497 | 517 | 604 | 653 | 673 | 739 | 788 | 827 | 909 | 982 |
| 021              | 042 | 166 | 229 | 252 | 272 | 342 | 408 | 455 | 475 | 498 | 518 | 605 | 654 | 674 | 740 | 796 | 828 | 913 | 983 |
| 022              | 113 | 167 | 231 | 253 | 273 | 343 | 409 | 456 | 476 | 499 | 519 | 614 | 655 | 675 | 741 | 797 | 829 | 914 | 987 |
| 023              | 114 | 168 | 232 | 254 | 274 | 344 | 410 | 457 | 477 | 500 | 520 | 615 | 656 | 707 | 742 | 798 | 830 | 927 | 988 |
| 024              | 115 | 183 | 233 | 255 | 296 | 345 | 411 | 458 | 478 | 501 | 570 | 616 | 657 | 708 | 743 | 799 | 853 | 928 | 989 |
| 025              |     |     |     |     |     |     |     |     |     |     |     |     |     |     |     |     |     |     |     |

DRG, diagnosis-related group

**Supplemental Methods:** Approaches used to determine the disability proxy score

Disability Proxy Score: We developed a disability proxy score specifically for use with dialysis patient claims data designed, in part, to attempt to identify disability. While this score has not been validated by medical records review, we have used it in several investigations; details of the development of the score and an example of its application have been previously published (Wetmore et al. *Clin J Am Soc Nephrol.* 2016;11:1413-21; Wetmore et al. *Am J Kidney Dis.* 2018;71:831-41). In brief, established scores, such as the Fried Frailty Score, are excellent tools, but are imperfect for our use because typical measures that might be proxies for frailty, functional status, and disability are not, unfortunately, available in Medicare claims data. We attempted to develop claims-based measures that can potentially assess for disability which (1) use medical claims data and (2) are tailored to dialysis patients. Specifically, we assessed putative disability using evidence of particular diagnoses and the Medicare durable medical equipment (DME) files.

Potential markers of disability from the DME files were chosen by first limiting to those with prevalence greater than 1%, and then further limiting to those with an association with fracture, hospitalization, or mortality. Proportional hazards models were first used to investigate unadjusted associations of these markers with death, and adjusted associations (adjusted for demographics, comorbidity, erythropoietin dose, hemoglobin). The resulting potential markers of disability were: bed, oxygen, wheelchair, continuous positive airway pressure (CPAP) device, nebulizer, walker, commode, dressings, enteral supplies, diabetic shoes, diabetic supplies, suction canister, home health claim, hospice claim, skilled nursing facility claim, rehab claim,

myocardial infarction, history of stroke, depression, visual impairment, hip fracture, history of thyroid disease, and dementia.

Using this list, we constructed another proportional hazards model, with mortality as the outcome, to determine the additional contribution of these potential disability markers beyond demographic characteristics and comorbidity. The model was then reduced, and the following variables remained significant for mortality in the model, after adjusting for other patient characteristics and comorbidity:

- hospital bed
- wheelchair
- walker
- commode
- home oxygen
- CPAP device
- suction canister
- wound dressings
- enteral supplies
- home health claims
- hospice claims
- skilled nursing facility claims
- acute myocardial infarction (AMI)
- stroke
- hip fracture
- visual impairment

- dementia
- depression

Use of hospital bed, wheelchair, walker, commode, home oxygen, CPAP device, suction canister, wound dressings, and enteral supplies was ascertained from Medicare DME claim files based on Healthcare Common Procedure Coding System (HCPCS) codes. To define AMI, stroke, hip fracture, visual impairment, dementia, and depression, we required one or more inpatient, skilled nurse facility, home health, or hospice claims with a corresponding diagnosis code or two or more outpatient/Part B claims with corresponding diagnosis codes within a year. The HCPCS and International Classification of Diseases, Ninth Revision, Clinical Modification diagnosis codes are listed in **Supplemental Table 3**.

The disability proxy score was created by taking parameter estimates from the adjusted proportional hazards model (including demographics, comorbid conditions, and the above potential markers of disability), multiplying the parameter estimates by 10, setting to zero if between -0.5 and +0.5, rounding to integer, and summing. The C-statistic in the developmental cohort was 0.736. While the score was developed using hemodialysis patients who were incident in 2008, the performance characteristics of the score were assessed by applying the resulting score to a separate validation Medicare cohort. The validation cohort consisted of patients initiating hemodialysis the following year (that is, incident to dialysis in 2009), who therefore had virtually identical underlying case-mix characteristics. The resulting C-statistic in the validation cohort was 0.741.

The final score was calculated using the following formula: based on presence/absence of disease and/or equipment use:  $\text{score} = 1 \times \text{hospital bed} + 1 \times \text{wheelchair} - 1 \times \text{walker} - 1 \times$

commode + 3 × oxygen – 2 × CPAP device + 2 × suction canister + 1 × wound dressings + 3 ×  
enteral feedings + 1 × home health claim + 10 × hospice service claim + 2 × SNF claim + 2 ×  
AMI + 1 × history of stroke + 1 × hip fracture + 2 × dementia + 2 × depression

**Supplemental Table 3.** HCPCS and ICD-9-CM diagnosis codes used to define the disability proxy score

| Equipment Use/Disease | HCPCS/ICD-9-CM Diagnosis codes                                                                                                    |
|-----------------------|-----------------------------------------------------------------------------------------------------------------------------------|
| Hospital bed          | E0250, E0251, E0255, E0256, E0260, E0261, E0265, E0266, E0270, E0290-E0297, E0301-E0304                                           |
| Wheelchair            | A0130, E0971, E0973, E1089, E1090, E1250, E1260, E1285, E1290, E2365, E2601, K0001, K0003-K0007, K0010, K0011, K0195, K0813-K0898 |
| Walker                | E0100, E0105, E0130, E0135, E0140, E0141, E0143, E0144, E0147-E0149                                                               |
| Commode               | E0163, E0165, E0168, E0170, E0171, E0275, E0276                                                                                   |
| Home oxygen           | E0425, E0430, E0431, E0433-E0435, E0439, E0440, E1390, K0738, K0741                                                               |
| CPAP device           | A7027, A7034-A7039, A7044-A7046, E0470, E0561, E0562, E0601, E0618, E0619                                                         |
| Suction canister      | A7000-A7002                                                                                                                       |
| Dressings             | A6021-A6024, A6196-A6205, A6209-A6214, A6216-A6239, A6242-A6247, A6251-A6259, A6266, A6402-A6404, A6442-A6456                     |
| Enteral supplies      | B3034-B3036, B4081-4083, B4087, B4088, B4100, B4102, B4104, B4149, B4150, B4152-B4155, B4157, B9000, B9002                        |
| AMI                   | 410.x1                                                                                                                            |
| Stroke                | 430, 431, 432, 434.x1, 436.xx, V12.54                                                                                             |
| Hip fracture          | 733.14, 808.xx, 820.xx                                                                                                            |
| Visual impairment     | 361.xx, 362.xx, 365.xx, 366.xx, 369.xx                                                                                            |
| Dementia              | 290.xx                                                                                                                            |
| Depression            | 296.xx, 298.0, 300.4, 301.1x, 309.0, 309.1, 311                                                                                   |

AMI, acute myocardial infarction; CPAP, continuous positive airway pressure; HCPCS, Healthcare Common Procedure Coding System; ICD-9-CM, International Classification of Diseases, Ninth Revision, Clinical Modification.



**Supplemental Table 4.** Baseline characteristics of the study sample prior to inverse probability of treatment weighting

| <i>n</i>                           | <b>Treatment group</b> |                  | Standardized difference* |
|------------------------------------|------------------------|------------------|--------------------------|
|                                    | Warfarin<br>9088       | Apixaban<br>3118 |                          |
| Age in years, %                    |                        |                  |                          |
| 18-44                              | 1207 (13)              | 357 (11)         | 5.6                      |
| 45-64                              | 3458 (38)              | 1108 (36)        | 5.2                      |
| 65-74                              | 2488 (27)              | 877 (28)         | -1.7                     |
| 75-79                              | 879 (10)               | 356 (11)         | -5.7                     |
| 80+                                | 1056 (12)              | 420 (13)         | -5.6                     |
| Female sex, %                      | 4804 (53)              | 1693 (54)        | -2.9                     |
| Race, %                            |                        |                  |                          |
| White                              | 4572 (50)              | 1570 (50)        | -0.1                     |
| Black                              | 4204 (46)              | 1418 (46)        | 1.6                      |
| Other                              | 312 (3)                | 130 (4)          | -3.9                     |
| Urban residence, %                 | 7296 (80)              | 2480 (80)        | 1.9                      |
| Medicaid coverage, %               | 5258 (58)              | 1952 (63)        | -9.2                     |
| Low-income subsidy, %              | 6450 (71)              | 2343 (75)        | -9.4                     |
| Modality/vascular access, %        |                        |                  |                          |
| HD-catheter                        | 4403 (48)              | 1504 (48)        | 0.4                      |
| HD-AVG                             | 1369 (15)              | 504 (16)         | -3.0                     |
| HD-AVF                             | 2708 (31)              | 934 (30)         | 1.4                      |
| PD                                 | 536 (6)                | 176 (6)          | 1.1                      |
| Time on dialysis, %                |                        |                  |                          |
| 0 -< 6 months                      | 1600 (18)              | 515 (17)         | 2.9                      |
| 6 -< 12 months                     | 646 (7)                | 223 (7)          | -0.2                     |
| 1 -< 3 years                       | 2198 (24)              | 733 (24)         | 1.6                      |
| 3 -< 5 years                       | 1556 (17)              | 575 (18)         | -3.5                     |
| 5 -< 8 years                       | 1631 (18)              | 512 (16)         | 4.1                      |
| ≥8 years                           | 1457 (16)              | 560 (18)         | -5.1                     |
| Primary cause of kidney failure, % |                        |                  |                          |
| Diabetes                           | 4087 (45)              | 1517 (49)        | -7.4                     |
| Hypertension                       | 2775 (31)              | 1001 (32)        | -3.4                     |
| Glomerulonephritis                 | 919 (10)               | 213 (7)          | 11.8                     |
| Other                              | 1307 (14)              | 387 (12)         | 5.8                      |
| VTE type, %                        |                        |                  |                          |
| DVT only                           | 6624 (73)              | 2394 (77)        | -9.0                     |
| PE with or without DVT             | 2464 (27)              | 724 (23)         | 9.0                      |
| Provoking VTE factors, %           |                        |                  |                          |

|                                     |             |             |      |
|-------------------------------------|-------------|-------------|------|
| Surgery                             | 2150 (24)   | 766 (25)    | -2.1 |
| Institutional stay of $\geq 3$ days | 4731 (52)   | 1628 (52)   | -0.3 |
| Active cancer or chemotherapy       | 1243 (14)   | 442 (14)    | -1.4 |
| Comorbid conditions, %              |             |             |      |
| Heart failure                       | 5374 (59)   | 1858 (60)   | -0.9 |
| Myocardial infarction               | 2167 (24)   | 689 (22)    | 4.2  |
| Cerebrovascular disease             | 2109 (23)   | 734 (24)    | -0.8 |
| Peripheral artery disease           | 3525 (39)   | 1286 (41)   | -5.0 |
| COPD                                | 3822 (42)   | 1268 (41)   | 2.8  |
| Peptic ulcer                        | 383 (4)     | 117 (4)     | 2.4  |
| Liver disease                       | 1328 (15)   | 419 (13)    | 3.4  |
| Coagulopathy                        | 2368 (26)   | 713 (23)    | 7.4  |
| Alcohol abuse                       | 306 (3)     | 96 (3)      | 1.6  |
| Tobacco use                         | 4215 (46)   | 1396 (45)   | 3.2  |
| History of falls                    | 1599 (18)   | 628 (20)    | -6.5 |
| Disability proxy score, %           |             |             |      |
| $\leq 0$                            | 2127 (23)   | 730 (23)    | 0.0  |
| 1-2                                 | 2461 (27)   | 788 (25)    | 4.1  |
| 3-4                                 | 2025 (22)   | 732 (24)    | -2.8 |
| 5-6                                 | 1411 (16)   | 494 (16)    | -0.9 |
| 7+                                  | 1064 (12)   | 374 (12)    | -0.9 |
| Medication use on index date, %     |             |             |      |
| Antidiabetic                        | 2112 (23)   | 819 (26)    | -7.0 |
| Antihypertensive                    | 3503 (39)   | 1230 (39)   | -1.9 |
| Antiarrhythmic                      | 463 (5)     | 198 (6)     | -5.4 |
| Statin                              | 3217 (35)   | 1248 (40)   | -9.6 |
| Antiplatelet                        | 1170 (13)   | 494 (16)    | -8.5 |
| NSAID                               | 107 (1)     | 54 (2)      | -4.6 |
| Corticosteroid                      | 586 (6)     | 204 (7)     | -0.4 |
| SSRI/SNRI                           | 1309 (15)   | 522 (17)    | -3.9 |
| Proton pump inhibitor               | 2700 (30)   | 988 (32)    | -4.3 |
| Antineoplastic                      | 248 (3)     | 100 (3)     | -2.8 |
| ED/observation visits, mean (SD)    | 1.6 (2.7)   | 1.7 (2.6)   | -2.4 |
| Inpatient visits, mean (SD)         | 2.4 (1.8)   | 2.3 (1.8)   | 5.0  |
| Hospitalization days, mean (SD)     | 24.4 (22.2) | 21.3 (22.1) | 14.3 |

\*The standardized difference (reported as a percentage) represents the difference in means or proportions of the two groups scaled by the pooled standard deviation.

AVF, arteriovenous fistula; AVG, arteriovenous graft; COPD, chronic obstructive pulmonary disease; DVT, deep venous thrombosis; ED, emergency department; KF, kidney failure; HD, hemodialysis; NSAID, non-steroidal anti-inflammatory drug; PD, peritoneal dialysis; PE, pulmonary embolism; SD, standard deviation; SNRI, serotonin-norepinephrine reuptake inhibitor; SSRI, serotonin selective reuptake inhibitor

**Supplemental Table 5.** Pattern of drug discontinuation or switching over time

| Initial Drug Prescribed          | N (%)             |                   |
|----------------------------------|-------------------|-------------------|
|                                  | 6-month follow-up | 3-month follow-up |
| Warfarin                         | 9088              | 9088              |
| Switch to apixaban or other DOAC | 293 (3%)          | 259 (3%)          |
| Discontinue                      | 6730 (74%)        | 4991 (55%)        |
| Apixaban label-concordant        | 3118              | 3118              |
| Switch to warfarin or other DOAC | 93 (3%)           | 86 (3%)           |
| Discontinue                      | 2333 (75%)        | 1934 (62%)        |

DOAC, direct oral anticoagulants

**Supplemental Table 6.** Reasons for the end of follow-up for the ITT analysis

| Cause                           | N (%)             |                   |
|---------------------------------|-------------------|-------------------|
|                                 | 6-month follow-up | 3-month follow-up |
| Death                           | 1956 (16%)        | 1221 (10%)        |
| End of Medicare coverage        | 486 (4%)          | 271 (2%)          |
| Modality change/transplant      | 278 (2%)          | 169 (1%)          |
| End of follow-up (Dec 31, 2018) | 9486 (78%)        | 10,545 (86%)      |

ITT, intention-to-treat

**Supplemental Figure 1.** Comparisons, adjusted using IPT and IPC weighting for sociodemographic factors, comorbid conditions, disability proxy score, concomitant medications, and healthcare utilization, for apixaban vs. warfarin in the 3-month follow-up analysis.

CAS, censored-at-switching; CI, confidence interval; HR, hazard ratio; IPC, inverse-probability-of-censoring; IPT, inverse-probability-of-treatment; ITT, intention-to-treat; PY, person-years;

VTE, venous thromboembolism

### Supplemental Figure 1

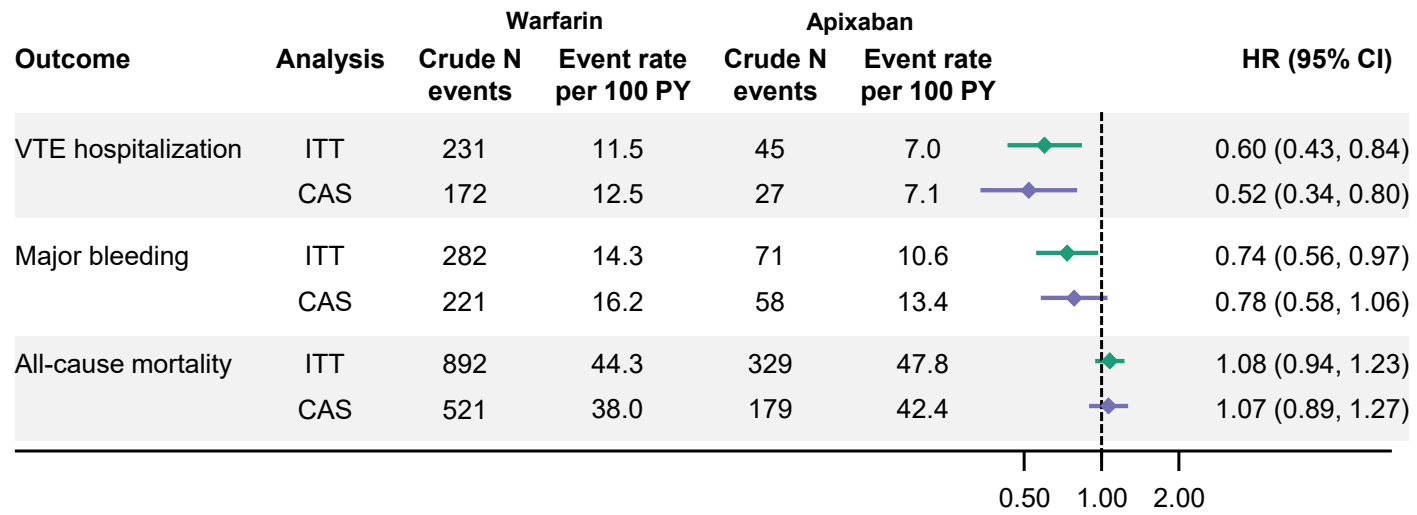

Supplement: CJN.14021021SupplementaryData1.pdf [file CJN.14021021SupplementaryData1.pdf]
